# Supplementary material
Source: Springer Nature journal article supplement (https://www.springermedizin.de/resource/supplementary/13014_2006_18_MOESM4_ESM.pdf/9632736)

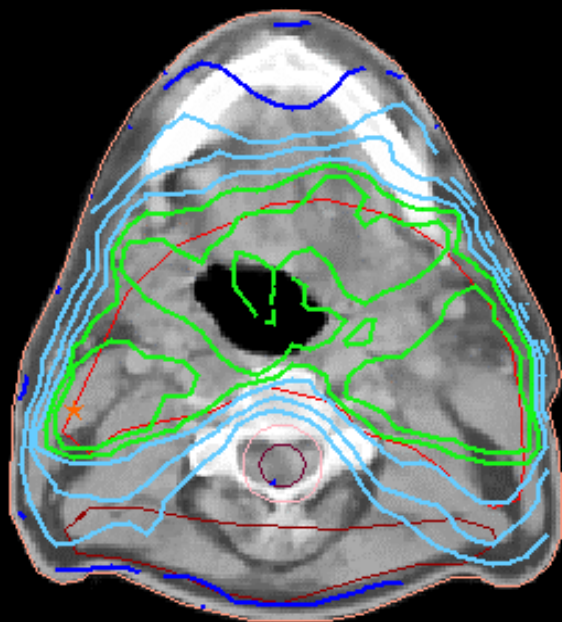

%

107

100

95

90

80

70

60

50

30

10

Supplement: MOESM4 [file 9632736]
